# Supplementary material for: Targeting mutant KRAS with CRISPR-Cas9 controls tumor growth
Source: HighWire-hosted journal article supplement (doi:10.1101/gr.223891.117), 2018-01-11
Supplement: Supplemental_Code.docx [file Supplemental_Code.docx]

#!/usr/bin/python3

import os, re

import pdb

import subprocess as sp

from collections import Counter

""" Prefix for type checking

s:string

i:int

f:float

l:list

d:dictionary

"""

sSamtools = "/path/to/samtools-1.6/samtools"

sBam_output = "/path/to/Result/BWA/Sorted_sample.bam"

sMutCount_output = "/path/to/Result/MutCount_output/MutCount_output.txt"

sBam_output_dir = "/path/to/Result/BWA"

sMutFunc_output = "/path/to/Result/MutFunc_output"

dCodontable = {

'ATA': 'I', 'ATC': 'I', 'ATT': 'I', 'ATG': 'M',

'ACA': 'T', 'ACC': 'T', 'ACG': 'T', 'ACT': 'T',

'AAC': 'N', 'AAT': 'N', 'AAA': 'K', 'AAG': 'K',

'AGC': 'S', 'AGT': 'S', 'AGA': 'R', 'AGG': 'R',

'CTA': 'L', 'CTC': 'L', 'CTG': 'L', 'CTT': 'L',

'CCA': 'P', 'CCC': 'P', 'CCG': 'P', 'CCT': 'P',

'CAC': 'H', 'CAT': 'H', 'CAA': 'Q', 'CAG': 'Q',

'CGA': 'R', 'CGC': 'R', 'CGG': 'R', 'CGT': 'R',

'GTA': 'V', 'GTC': 'V', 'GTG': 'V', 'GTT': 'V',

'GCA': 'A', 'GCC': 'A', 'GCG': 'A', 'GCT': 'A',

'GAC': 'D', 'GAT': 'D', 'GAA': 'E', 'GAG': 'E',

'GGA': 'G', 'GGC': 'G', 'GGG': 'G', 'GGT': 'G',

'TCA': 'S', 'TCC': 'S', 'TCG': 'S', 'TCT': 'S',

'TTC': 'F', 'TTT': 'F', 'TTA': 'L', 'TTG': 'L',

'TAC': 'Y', 'TAT': 'Y', 'TAA': '*', 'TAG': '*',

'TGC': 'C', 'TGT': 'C', 'TGA': '*', 'TGG': 'W',

}

def Count_mut():

cnt = Counter()

iTot = 0

for i, sRow in enumerate(sp.Popen(sSamtools + " view %s" % sBam_output, stdout=sp.PIPE, shell=True).stdout.readlines()):

lCol = sRow.decode("utf-8").replace("\n", "").split('\t')

iStart = int(lCol[3]) - 1

sSeq = lCol[9]

sTarget_seq = sSeq[31 - iStart:41 - iStart]

if len(sTarget_seq.strip()) == 10:

cnt[sTarget_seq] += 1

iTot += 1

with open(sMutCount_output, 'w') as Output:

Output.write("Total reads: " + str(iTot) + '\n')

for sMut_type, iCount in cnt.most_common():

Output.write(sMut_type + "\t" + str(iCount) + "\n")

def Count_mut_func():

"""

Without indels With indels

Samples Sample explantation WT Original GOF Secondary GOF Unclassfied point mutations Without indel total (C+D+E+F) inframe indels out of frame indels With indel total (H+I) total read (G+J)

"""

with open(sMutFunc_output + '/MutFunc_output.txt', 'w') as Output:

Output.write('\t'.join(['Sample', 'WT', 'Original_GOF', 'Secondary_GOF', 'Unclassified_point_mutations',

'Without_indel_total', 'inframe_indels', 'out_of_frame_indels',

'With_indel_total', 'total_read', 'AA_cnt', '6bp_Sequence_cnt', 'Total_unclass_syn', 'unclass_syn_AA', 'unclass_syn_seq',

'Total_unclass_nonsyn', 'unclass_nonsyn_AA', 'unclass_nonsyn_seq', ]) + '\n')

for sFilename in os.listdir(sBam_output_dir):

if sFilename.split('.')[-1] != 'bam': continue

if sFilename[:6] != 'Sorted': continue

# print(sFilename)

dCnt = {'WT': 0, 'Original_GOF': 0, 'Secondary_GOF': 0, 'Unclassfied_point_mutations': 0, 'Without_indel_total': 0,

'inframe_indels': 0, 'out_of_frame_indels': 0, 'With_indel_total': 0, 'total_read': 0}

AA_cnt = Counter()

Codon_cnt = Counter()

AA_uncla_nonsyn_cnt = Counter()

AA_uncla_syn_cnt = Counter()

Codon_uncla_nonsyn_cnt = Counter()

Codon_uncla_syn_cnt = Counter()

for i, sRow in enumerate(sp.Popen(sSamtools + " view %s" % sBam_output_dir + '/' + sFilename, stdout=sp.PIPE, shell=True).stdout.readlines()):

lCol = sRow.decode("utf-8").replace("\n", "").split('\t')

iStart = int(lCol[3]) - 1

sCigar = lCol[5]

sSeq = lCol[9]

iSeq_len = sum(map(int, re.findall(r'\d+', sCigar)))

if sSeq[:3] == 'ATG' and iSeq_len >= 70:

if len(sSeq) % 3 in [0, 2]:

dCnt['out_of_frame_indels'] += 1

dCnt['With_indel_total'] += 1

# print(sSeq, sCodon, sFunc_verdict)

elif len(sSeq) % 3 and (sCigar.find('I') != -1 or sCigar.find('D') != -1):

dCnt['inframe_indels'] += 1

dCnt['With_indel_total'] += 1

# print(sSeq, sCodon, sFunc_verdict)

else:

dCnt['Without_indel_total'] += 1

sSix_codon_seq = sSeq[33 - iStart:39 - iStart].upper()

if len(sSix_codon_seq) == 6:

sDouble_codon = dCodontable[sSix_codon_seq[:3]] + dCodontable[sSix_codon_seq[3:]]

if sSix_codon_seq == 'GGTGGC':

dCnt['WT'] += 1

else:

if sSix_codon_seq in ['GATGGC', 'GTTGGC', 'TGTGGC', 'GGTGAC', 'CGTGGC', 'GCTGGC', 'AGTGGC']:

sFunc_verdict = 'Original_GOF'

elif sSix_codon_seq in ['GACGGC', 'GTCGGC', 'GTAGGC', 'GTGGGC', 'TGCGGC', 'CGCGGC',

'CGAGGC', 'CGGGGC', 'AGAGGC', 'AGGGGC', 'GCCGGC', 'GCAGGC',

'GCGGGC', 'TCTGGC', 'TCCGGC', 'TCAGGC', 'TCGGGC', 'AGCGGC',

'GGTGAT']:

sFunc_verdict = 'Secondary_GOF'

AA_cnt[sDouble_codon] += 1

Codon_cnt[sSix_codon_seq + '(%s)' % sDouble_codon] += 1

elif '*' in sDouble_codon:

sFunc_verdict = 'out_of_frame_indels'

else:

sFunc_verdict = 'Unclassfied_point_mutations'

if sDouble_codon == 'GG':

AA_uncla_syn_cnt[sDouble_codon] += 1

Codon_uncla_syn_cnt[sSix_codon_seq + '(%s)' % sDouble_codon] += 1

else:

AA_uncla_nonsyn_cnt[sDouble_codon] += 1

Codon_uncla_nonsyn_cnt[sSix_codon_seq + '(%s)' % sDouble_codon] += 1

dCnt[sFunc_verdict] += 1

iWithout_indel_total = dCnt['WT'] + dCnt['Original_GOF'] + dCnt['Secondary_GOF'] + dCnt['Unclassfied_point_mutations']

iWith_indel_total = dCnt['inframe_indels'] + dCnt['out_of_frame_indels']

iTotal_read = dCnt['Without_indel_total'] + dCnt['With_indel_total']

sAA_cnt = ','.join([i[0] + ':' + str(i[1]) for i in AA_cnt.most_common()])

sCodon_cnt = ','.join([i[0] + ':' + str(i[1]) for i in Codon_cnt.most_common()])

sAA_uncla_syn_cnt = ','.join([i[0] + ':' + str(i[1]) for i in AA_uncla_syn_cnt.most_common()])

sCodon_uncla_syn_cnt = ','.join([i[0] + ':' + str(i[1]) for i in Codon_uncla_syn_cnt.most_common()])

iTotal_AA_uncla_syn_cnt = sum(i[1] for i in AA_uncla_syn_cnt.most_common())

sAA_uncla_nonsyn_cnt = ','.join([i[0] + ':' + str(i[1]) for i in AA_uncla_nonsyn_cnt.most_common()])

sCodon_uncla_nonsyn_cnt = ','.join([i[0] + ':' + str(i[1]) for i in Codon_uncla_nonsyn_cnt.most_common()])

iTotal_AA_uncla_nonsyn_cnt = sum(i[1] for i in AA_uncla_nonsyn_cnt.most_common())

Output.write('\t'.join(map(str, [sFilename.replace('Sorted_', '').replace('.bam', ''),

dCnt['WT'], dCnt['Original_GOF'], dCnt['Secondary_GOF'], dCnt['Unclassfied_point_mutations'],

iWithout_indel_total, dCnt['inframe_indels'], dCnt['out_of_frame_indels'], iWith_indel_total,

iTotal_read, sAA_cnt, sCodon_cnt, iTotal_AA_uncla_syn_cnt, sAA_uncla_syn_cnt, sCodon_uncla_syn_cnt,

iTotal_AA_uncla_nonsyn_cnt, sAA_uncla_nonsyn_cnt, sCodon_uncla_nonsyn_cnt])) + "\n")

def Main():

Count_mut()

Count_mut_func()

if __name__ == '__main__':

Main()
